# Supplementary material
Source: publisher figshare collection journal article supplement (https://acs.figshare.com/ndownloader/files/5686326)
Supplement: Supplementary file 1 [file 5686326]

## **Supporting Information**

### **Anodic oxidative modification of egg white for heat treatment**

Masahito Takahashi<sup>a</sup>, Akihiro Handa<sup>b</sup>, Yusuke Yamaguchi<sup>a</sup>, Risa Kodama<sup>b</sup>, and Kazuhiro Chiba<sup>a\*</sup>

<sup>a</sup> Department of Applied Biological Science, Tokyo University of Agriculture and Technology, 3-5-8 Saiwai-cho, Fuchu, Tokyo 183-8509, Japan.

<sup>b</sup> Institute of Technology, R&D Division, Kewpie Corporation, 2-5-7 Sengawa, Chofu, Tokyo 182-0002, Japan

\* corresponding author (e-mail: [chiba@cc.tuat.ac.jp](mailto:chiba@cc.tuat.ac.jp))

## Additional figures and original figures of PAGE analysis

Native-PAGE

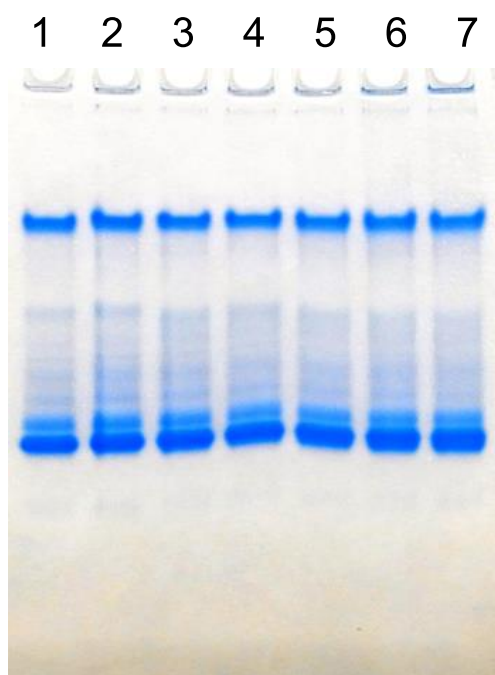

**Figure S1**

Lane 1: 0 C without salts; Lane 2: 0 C; Lane 3: 19.3 C; Lane 4: 38.6 C; Lane 5: 57.9 C;

Lane 6: 116 C; Lane 7: 174 C

(Carried out with TEFCO unit)

## SDS-PAGE

Without 2-mercaptoethanol

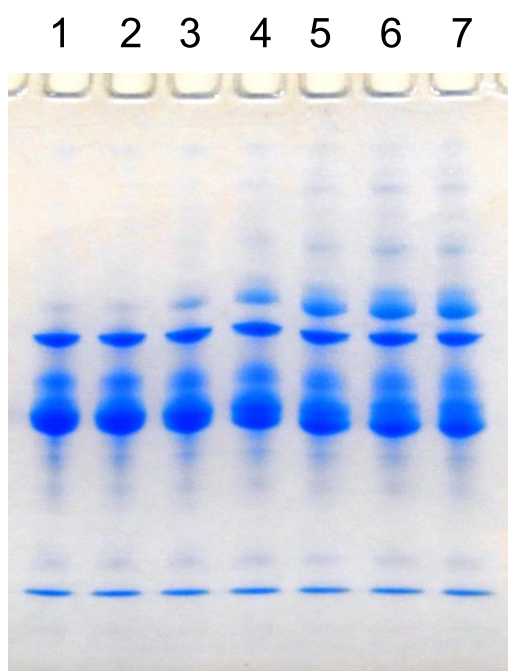

**Figure S2**

Lane 1: 0 C without salts; Lane 2: 0 C; Lane 3: 19.3 C; Lane 4: 38.6 C; Lane 5: 57.9 C;

Lane 6: 116 C; Lane 7: 174 C

(Carried out with TEFCO unit)

With 2-mercaptoethanol

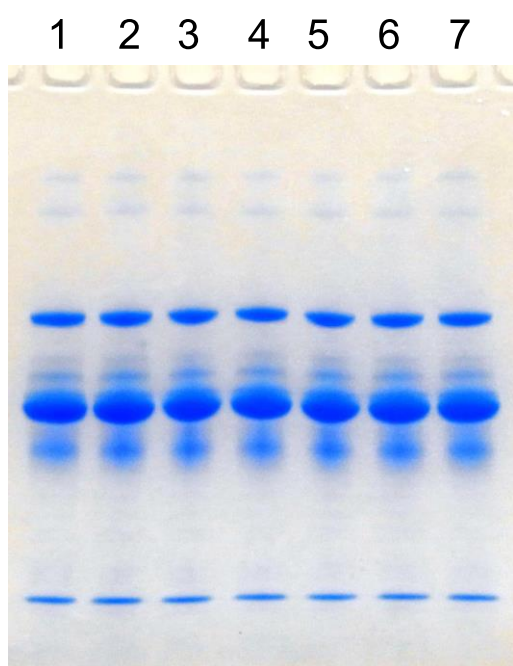

**Figure S3**

Lane 1: 0 C without salts; Lane 2: 0 C; Lane 3: 19.3 C; Lane 4: 38.6 C; Lane 5: 57.9 C;

Lane 6: 116 C; Lane 7: 174 C

(Carried out with TEFCO unit)

## Identification of protein bands

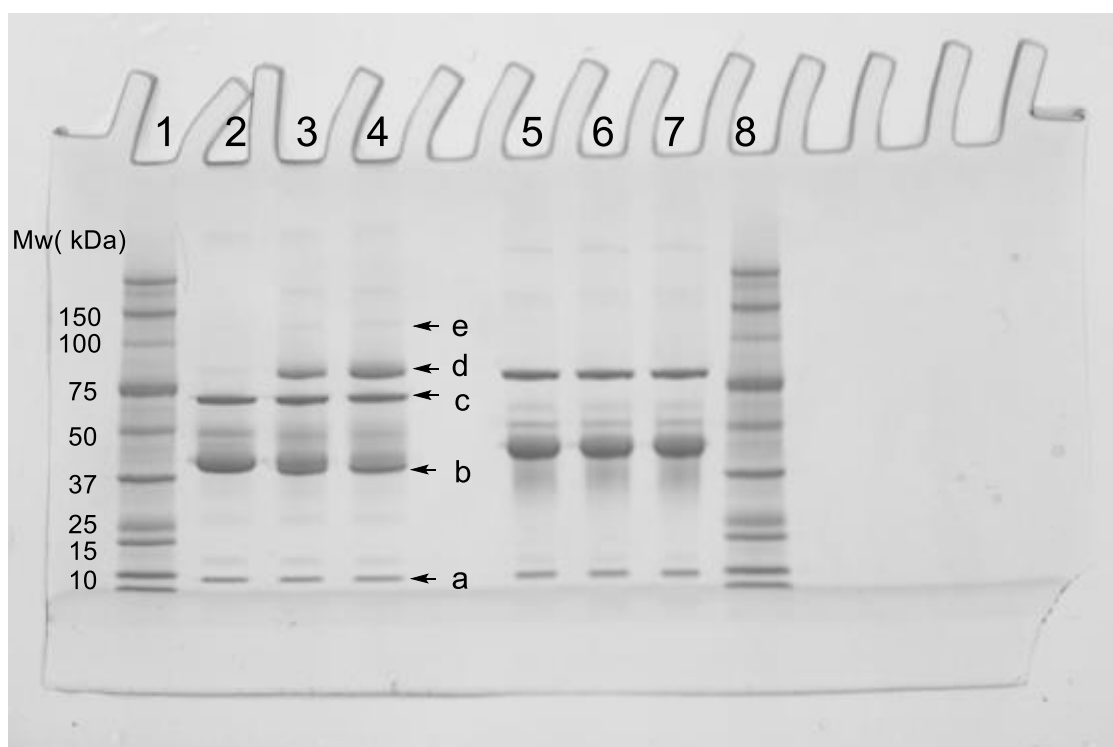

**Figure S4**

Without 2-mercaptoethanol (Lane 2: 0 C; Lane 3: 57.9 C; Lane 4: 174 C)

With 2-mercaptoethanol (Lane 5: 0 C; Lane 6: 57.9 C; Lane 7: 174 C)

Lane 1, 8: protein marker

a: lysozyme, b: ovalbumin monomer, c: ovotransferrin, d: ovalbumin dimer, e: ovalbumin trimer

(Carried out with DRC unit)

After heat treatment

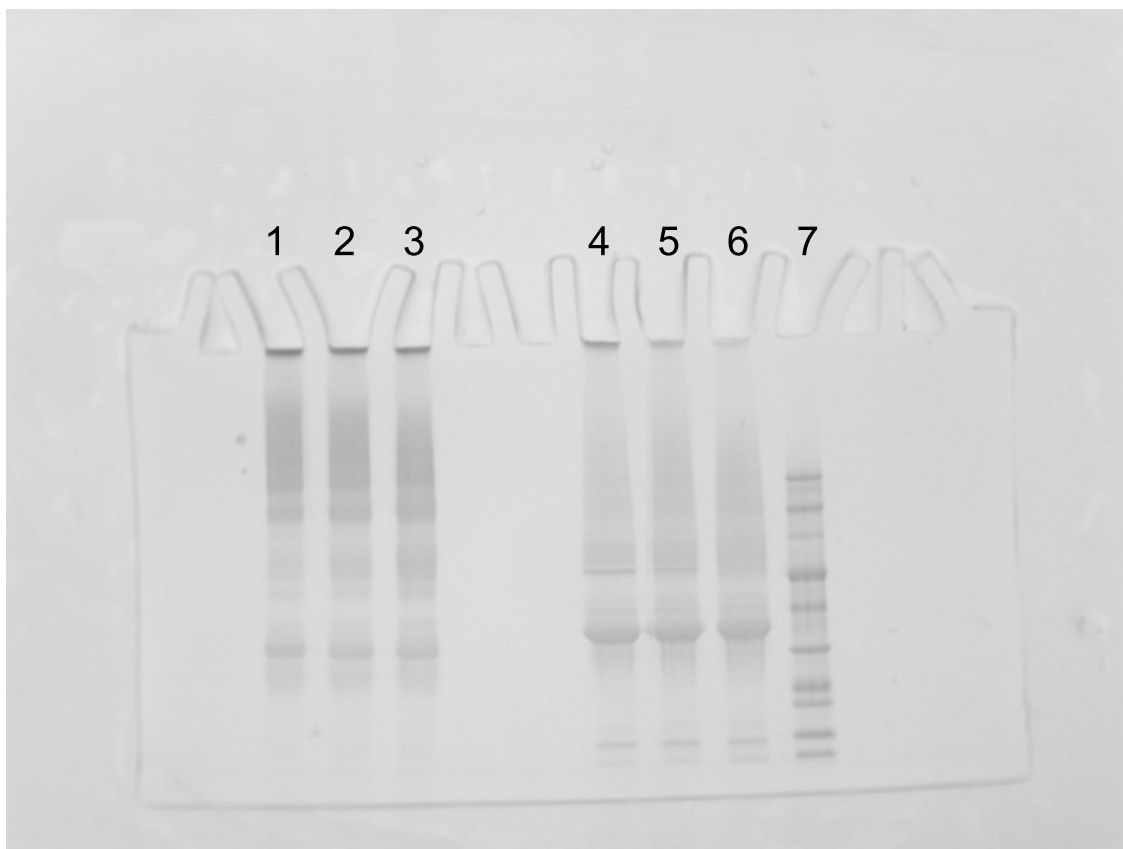

**Figure S5**

Without 2-mercaptoethanol (Lane 1: 0 C; Lane 2: 38.6 C; Lane 3: 174 C)

With 2-mercaptoethanol (Lane 4: 0 C; Lane 5: 38.6 C; Lane 6: 174 C)

Lane 7: protein marker

(Carried out with DRC unit)

## SEM figures

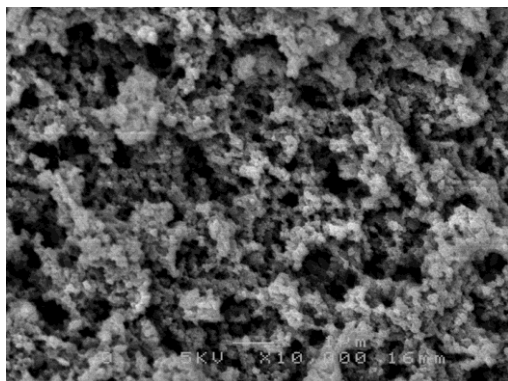

0 C x 10,000

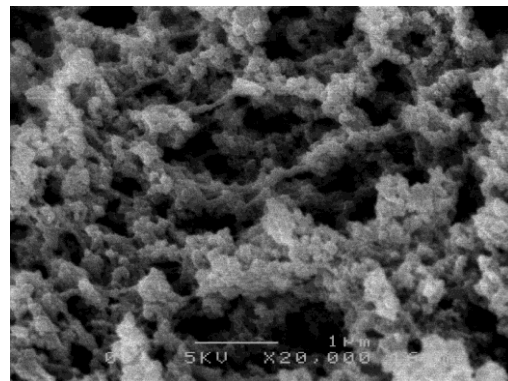

0 C x 20,000

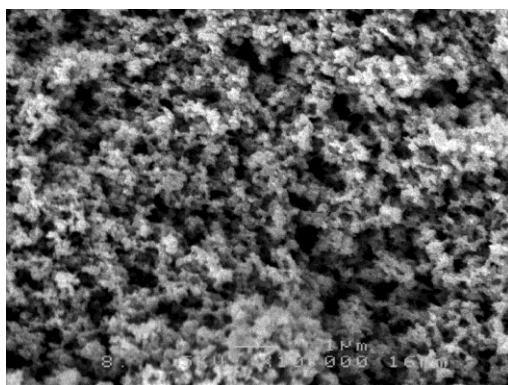

38.6 C x 10,000

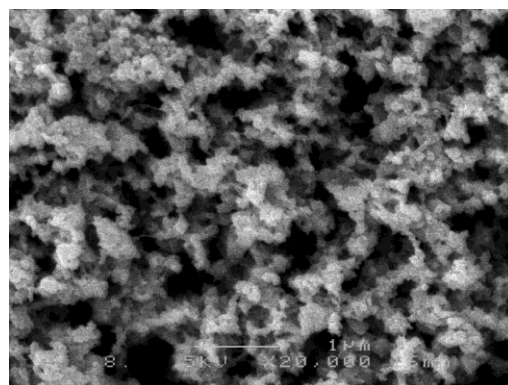

38.6 C x 20,000

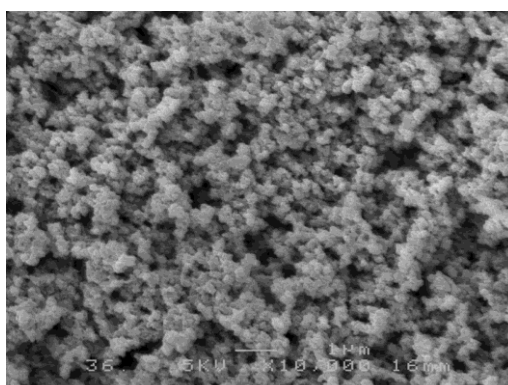

174 C x 10,000

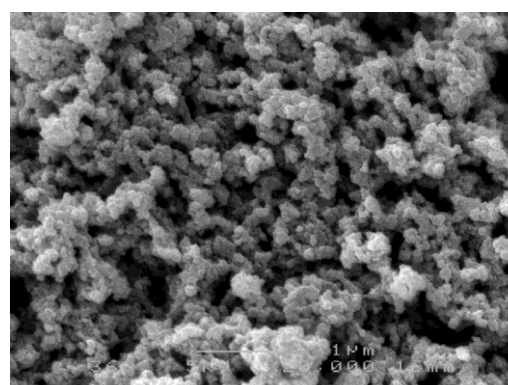

174 C x 20,000

**Figure S6**

**Figures of apparatus**

Glassy carbon electrode

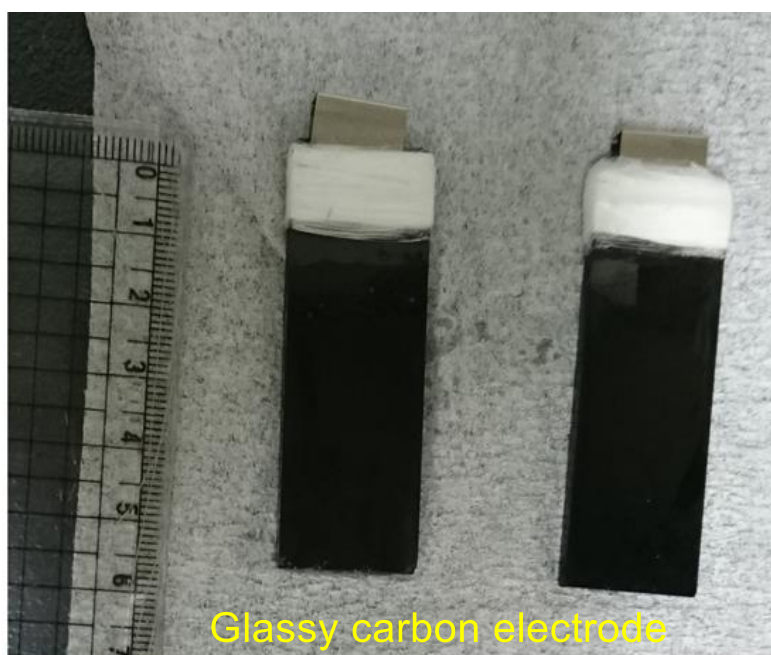

**Figure S7**



Reaction tube

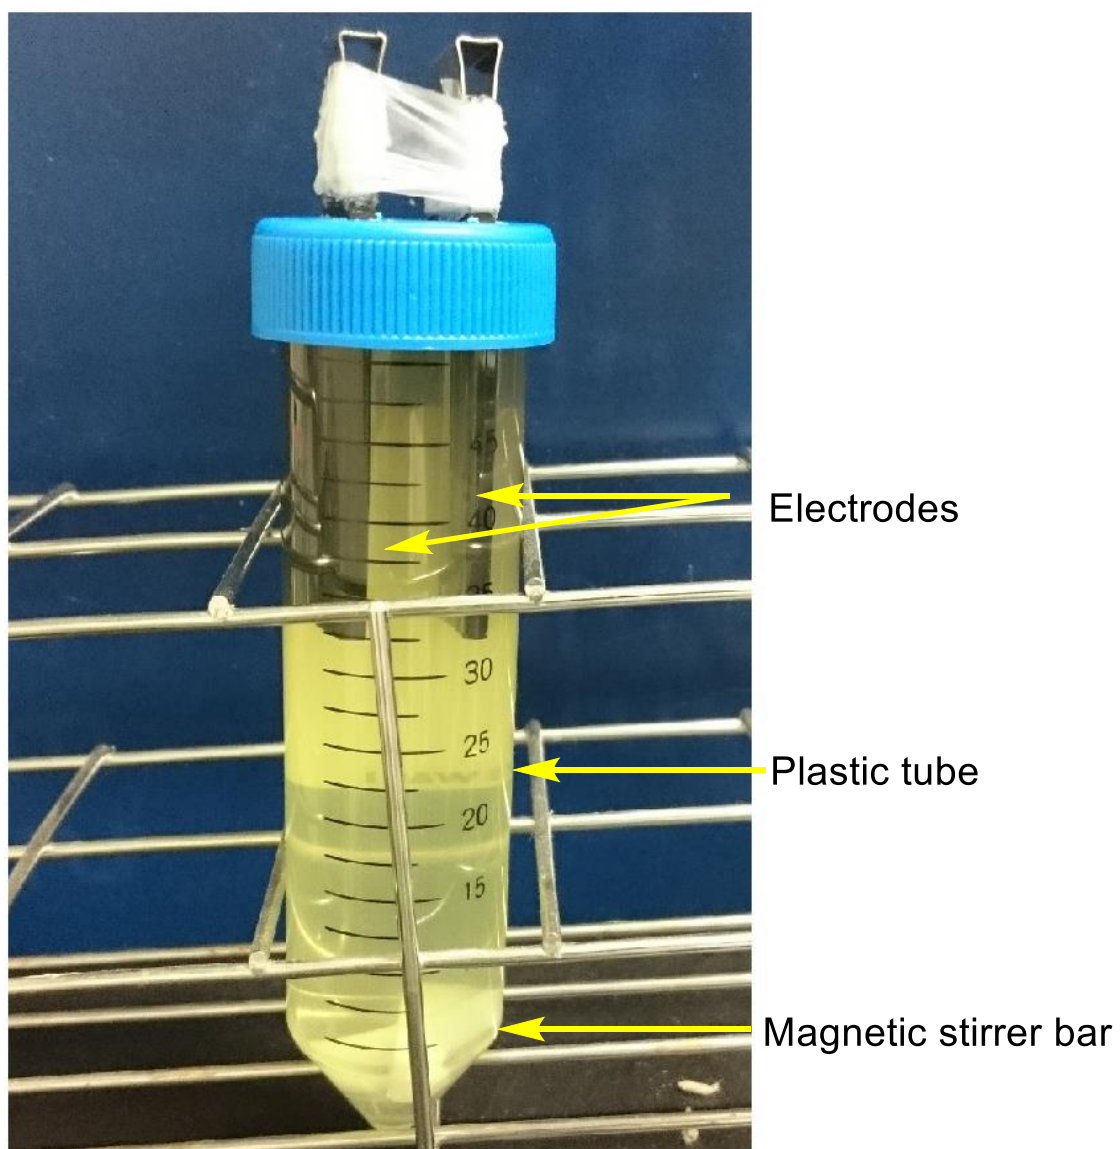

**Figure S8**

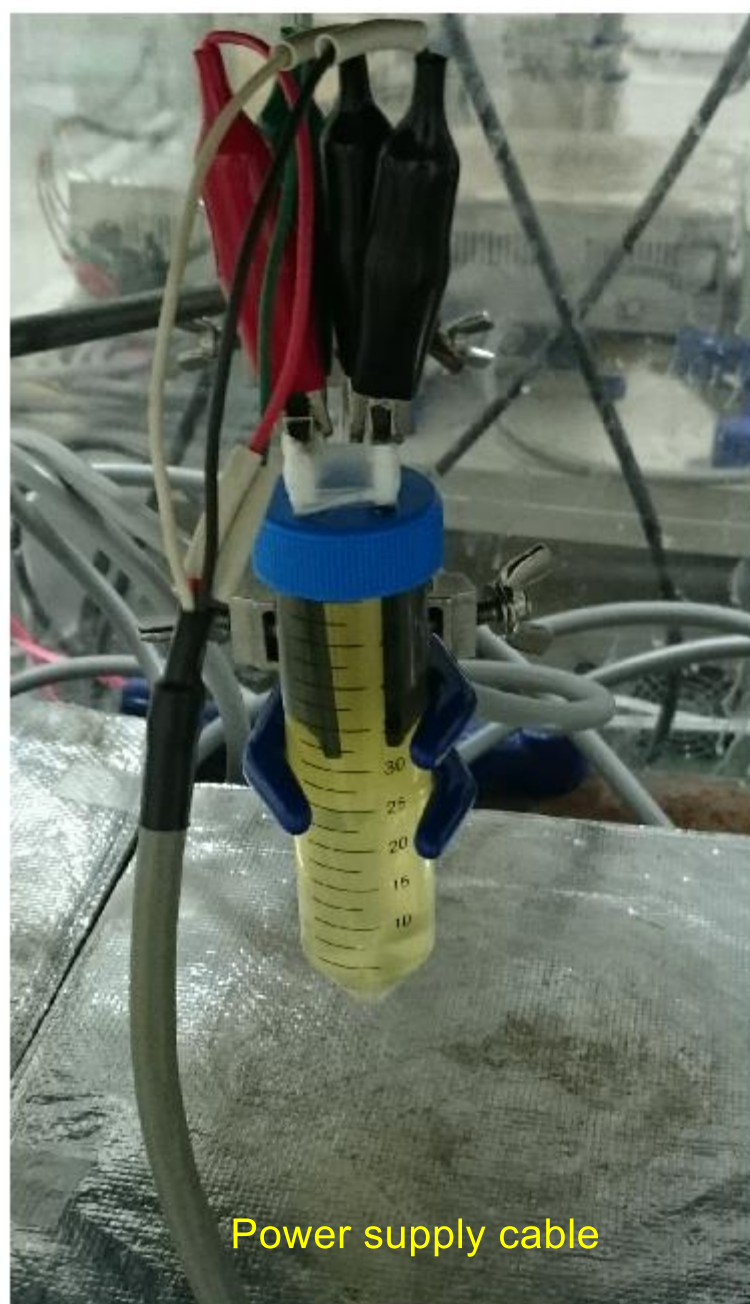

**Figure S9**
